# Supplementary material for: A multi-stimuli responsive organogel based on a tetrapeptide–dithienylcyclopentene conjugate
Source: Royal Society of Chemistry journal article supplement (doi:10.1039/c3sm51052b), 2013-01-01
Supplement: c3sm51052b.pdf [file c3sm51052b.pdf]

**Electronic Supplementary Information**  
**Multi-stimuli Responsive Organogels Based on**  
**Tetrapeptide-Dithienylcyclopentene Conjugate**

Yi Jiang,<sup>a</sup> Fei Zeng,<sup>b</sup> Ruiying Gong,<sup>a</sup> Zongxia Guo,<sup>a</sup> Chuan-Feng Chen,<sup>b</sup> Xiaobo Wan<sup>a\*</sup>

<sup>a</sup> Key Laboratory of Bio-mass based materials, Chinese Academy of Sciences, Qingdao Institute of Bioenergy and Bioprocess Technology, 189 Songling Road, Qingdao, Shandong Province, P. R. China, 266101. Phone +86 532-806-62741. Fax +86 532-806-62741. E-mail: wanxb@qibebt.ac.cn.

<sup>b</sup> Beijing National Laboratory for Molecular Sciences, CAS Key Laboratory of Molecular Recognition and Function, Institute of Chemistry, Chinese Academy of Sciences, Beijing 100190, China

**Contents**

|                                                                                         |           |
|-----------------------------------------------------------------------------------------|-----------|
| <b>1. Synthesis Section-----</b>                                                        | <b>S2</b> |
| <b>2. <sup>1</sup>H NMR and <sup>13</sup>C NMR spectra of gelator 1-----</b>            | <b>S3</b> |
| <b>3. PXRD Data of the organogel after addition of catechol-----</b>                    | <b>S4</b> |
| <b>4. Morphology of the organogel after addition of catechol determined by SEM-----</b> | <b>S4</b> |
| <b>5. Frequency sweep experiment of the organogel after addition of catechol----</b>    | <b>S5</b> |
| <b>6. <sup>1</sup>H NMR spectra of 1 before and after addition of catechol-----</b>     | <b>S5</b> |
| <b>7. The photochromic behavior of organogel 1 after addition of catechol-----</b>      | <b>S6</b> |
| <b>8. Plausible packing model of compound 1-----</b>                                    | <b>S6</b> |

## 1. Synthesis Section

**General.**  $^1\text{H}$  NMR and  $^{13}\text{C}$  NMR spectra were recorded on a Bruker AMX 600 spectrometer ( $^1\text{H}$  NMR: 600 MHz;  $^{13}\text{C}$  NMR: 150 MHz) at 298 K. HR-ESI mass spectra were obtained on a Bruker APEX IV instrument.

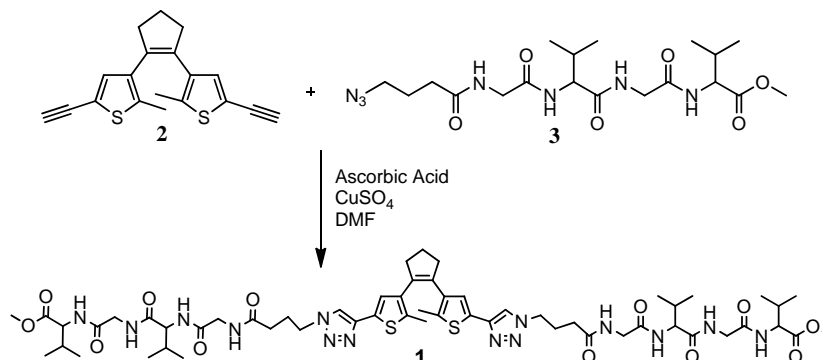

**Synthesis of Gelator 1.** The mixture of compound **2**<sup>1</sup> (61.6 mg, 0.1 mmol) and **3**<sup>2</sup> (91 mg, 0.2 mmol) in 5ml DMF was stirred in the presence of a catalytic amount of  $\text{CuSO}_4 \cdot 5\text{H}_2\text{O}$  (2.5 mg) and ascorbic acid (7mg) at room temperature overnight.  $\text{Et}_2\text{O}$  (30 ml) was added to the mixture, and the precipitate was filtered and washed with  $\text{Et}_2\text{O}$  to afford **1** as a pale yellow solid in 97% yield. M. P. = 147-149 °C;  $^1\text{H}$  NMR (600 MHz,  $\text{DMSO}-d_6$ ):  $\delta$  = 8.40 (s, 2H), 8.27 (t,  $J$  = 5.8 Hz, 2H), 8.12 (t,  $J$  = 5.8 Hz, 2H), 8.03 (d,  $J$  = 8.2 Hz, 2H), 7.86 (d,  $J$  = 8.2 Hz, 2H), 7.21 (s, 2H), 4.38 (t,  $J$  = 6.8 Hz, 4H), 4.19-4.16 (m, 4H), 3.80-3.73 (m, 6H), 3.63 (s, 6H), 2.81 (t,  $J$  = 7.4, 4H), 2.52-2.50 (m, 4H), 2.17 (t,  $J$  = 7.2, 4H), 2.08-1.97 (m, 10H), 1.89 (s, 6H), 0.88-0.84 (m, 24H);  $^{13}\text{C}$  NMR (150 MHz,  $\text{DMSO}-d_6$ ):  $\delta$  = 172.4, 171.9, 171.7, 169.5, 169.4, 142.0, 136.4, 134.4, 133.4, 129.6, 120.8, 58.2, 57.8, 52.2, 49.5, 42.4, 42.0, 32.1, 30.9, 30.5, 26.2, 19.6, 19.4, 18.64, 18.55, 14.4. HR-MS (ESI) calcd: 1219.5750 for  $[\text{M} + \text{H}^+]$ , 1241.5570 for  $[\text{M} + \text{Na}^+]$ ; Found: 1219.5786 for  $[\text{M} + \text{H}^+]$ , 1241.5606 for  $[\text{M} + \text{Na}^+]$ .

## References

- (1) Lin, Y.; Yuan, J.; Hu, M.; Cheng, J.; Yin, J.; Jin, S.; Liu, S. H. *Organometallics* 2009, **28**, 6402.
- (2) Gong, R.; Song, Y.; Guo, Z.; Li, M.; Jiang, Y.; Wan, X. *Supramolecular Chemistry* 2013, **25**, 269.

## 2. $^1\text{H}$ NMR and $^{13}\text{C}$ NMR spectra of gelator **1**.

jiangyi13-107;  $^1\text{H}$ NMR; DMSO

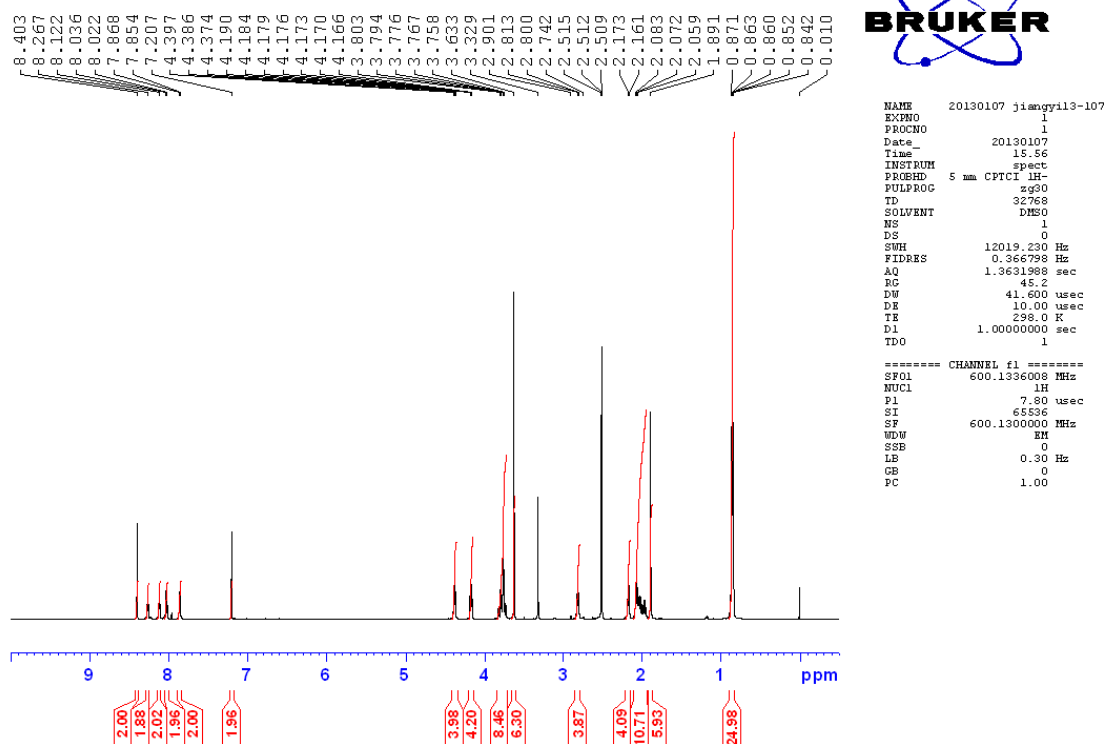

Fig. S1  $^1\text{H}$  NMR spectrum of gelator **1** (600 MHz, DMSO- $d_6$ ).

jiangyi13-107;  $^{13}\text{C}$ NMR; DMSO

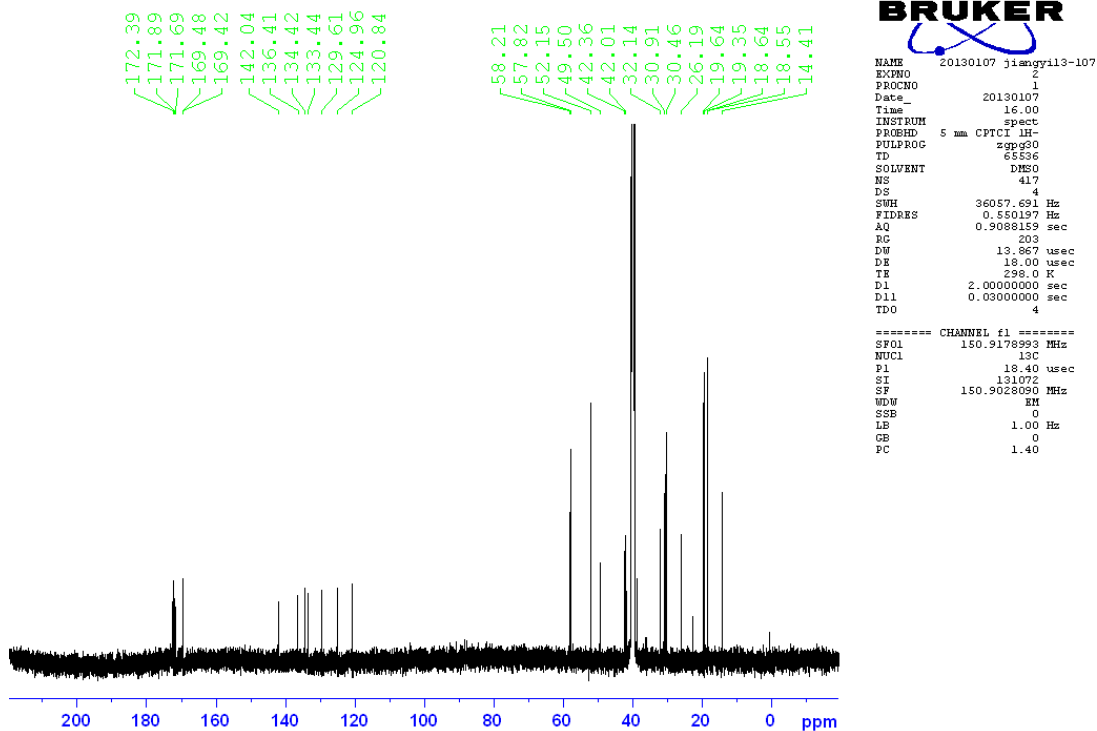

Fig. S2  $^{13}\text{C}$  NMR spectrum of gelator **1** (150 MHz, DMSO- $d_6$ ).

### 3. PXRD Data of the Organogel after addition of Catechol.

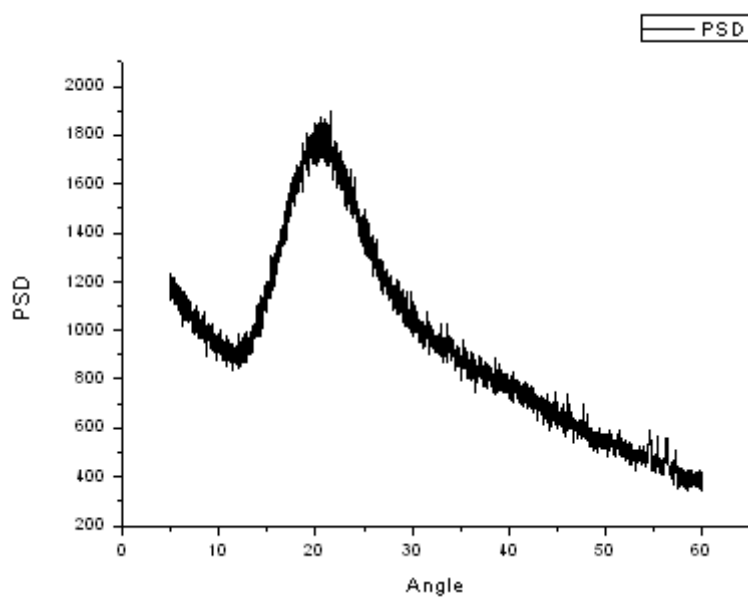

Fig. S3 PXRD Data of the organogel after addition of catechol.

### 4. Morphology of the Organogel after Addition of Catechol Determined by SEM

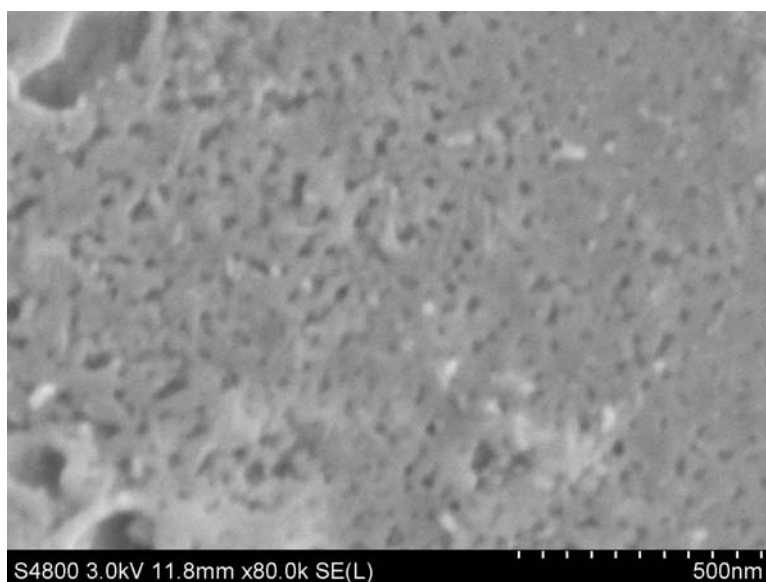

Fig. S4 Morphology of the organogel after addition of catechol determined by SEM.

## 5. Frequency Sweep Experiment of the Organogel after Addition of Catechol

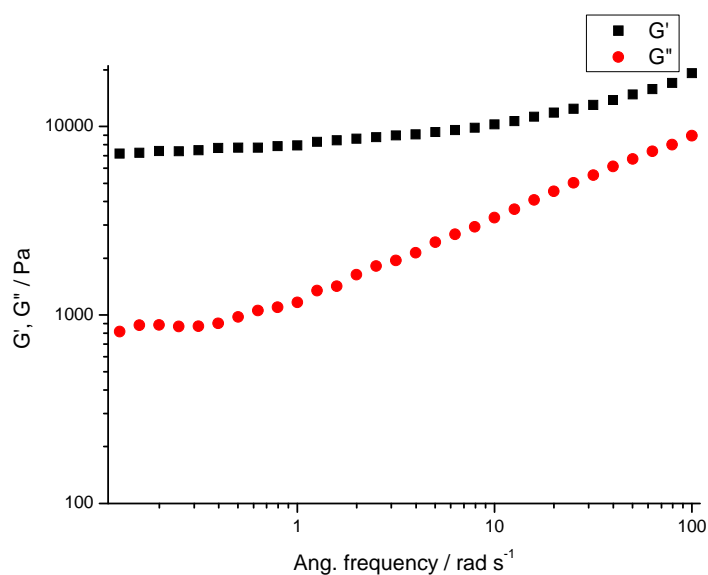

**Fig. S5** Frequency sweep experiment of the organogel after addition of catechol.

## 6. $^1\text{H}$ NMR spectra of **1** before and after addition of catechol.

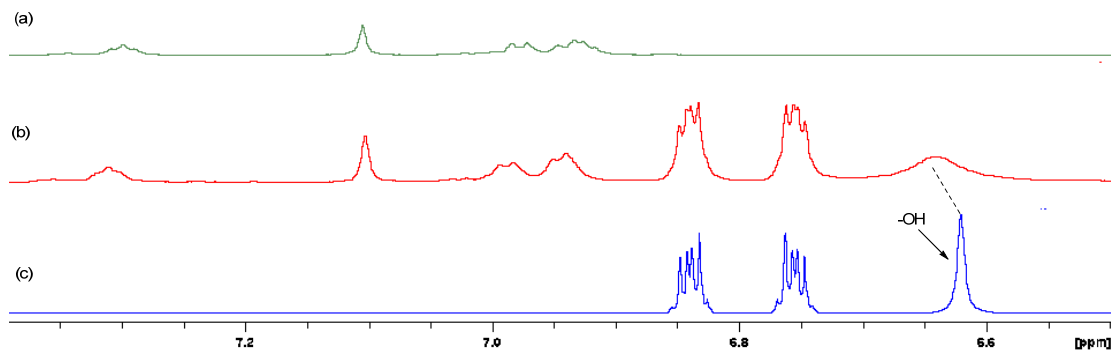

**Fig. S6** (a) Partial  $^1\text{H}$  NMR spectrum of **1** (5 mg/ml) in acetonitrile- $d_3$ ; (b) Partial  $^1\text{H}$  NMR spectrum of **1** (5 mg/ml) in acetonitrile- $d_3$  after addition of catechol (5 mg/ml); (c) Partial  $^1\text{H}$  NMR spectrum of catechol (5 mg/ml) in acetonitrile- $d_3$ .

## 7. The photochromic behavior of organogel 1 after addition of catechol.

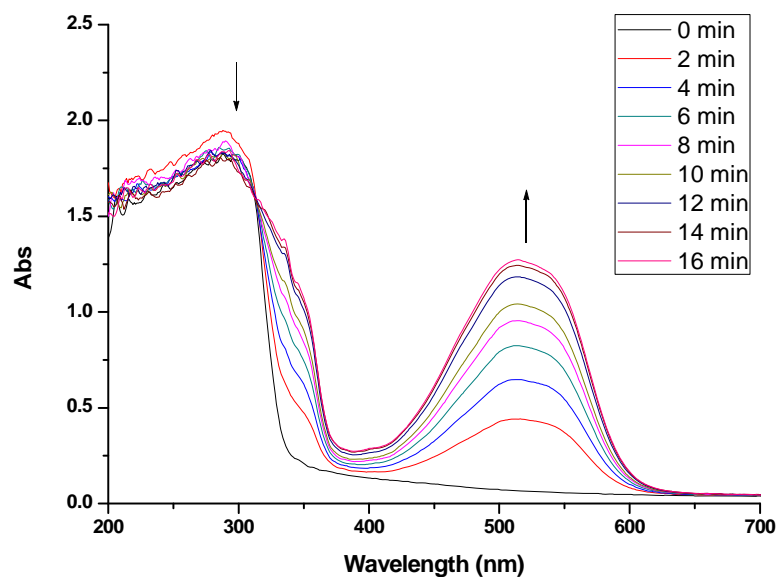

**Fig. S7** UV-Vis spectra of organogel 1 in THF (9 mg/ml) after addition of catechol (9 mg/ml) under 365 nm irradiation with different times.

## 8. Plausible packing model of compound 1.

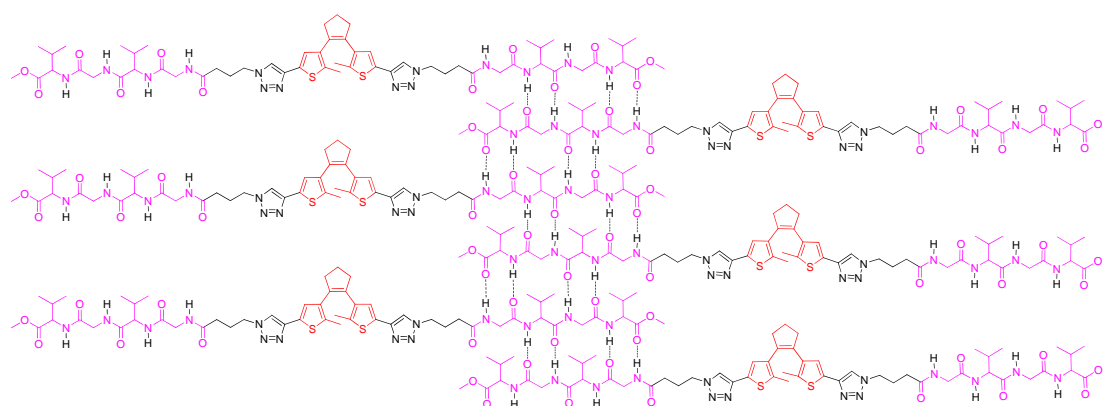

**Fig. S8** Plausible packing model of compound 1.
